# Supplementary material for: Self-assembly of a short-chain ionic liquid within deep eutectic solvents
Source: Royal Society of Chemistry journal article supplement (doi:10.1039/c7ra13557b), 2018-01-01
Supplement: c7ra13557b1.pdf [file c7ra13557b1.pdf]

## Supporting Information (S)

**Fig. S1** PyCHO (1 $\mu$ M) intensity versus log [Bmim][OS] (M) at ambient conditions ( $\lambda_{\text{max}} = 367$  nm and slit width 5nm)

**Fig. S2** Absorption spectra of PH with increasing concentration of (A) Drugs-[Bmim][OS]-ChCl-Urea and (B) Benesi-Hildebrand plot using changes in absorption spectra of Drugs-[Bmim][OS]-ChCl-Urea.

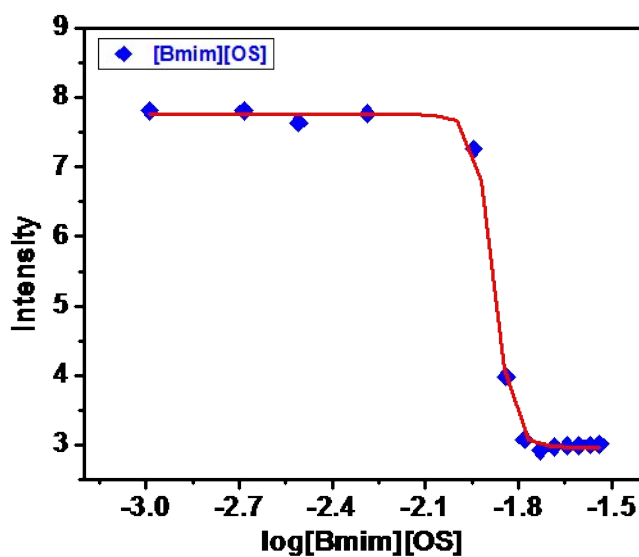

**Fig. S1** PyCHO (1 $\mu$ M) intensity versus log [Bmim][OS] (M) at ambient conditions ( $\lambda_{\text{max}} = 367$  nm and slit width 5nm)

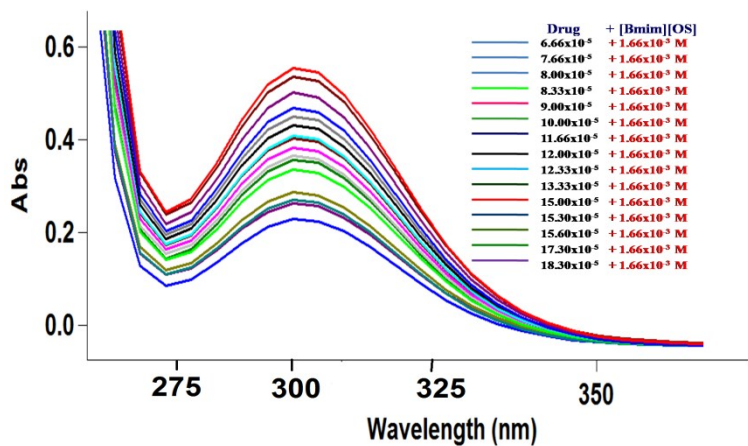

[A]

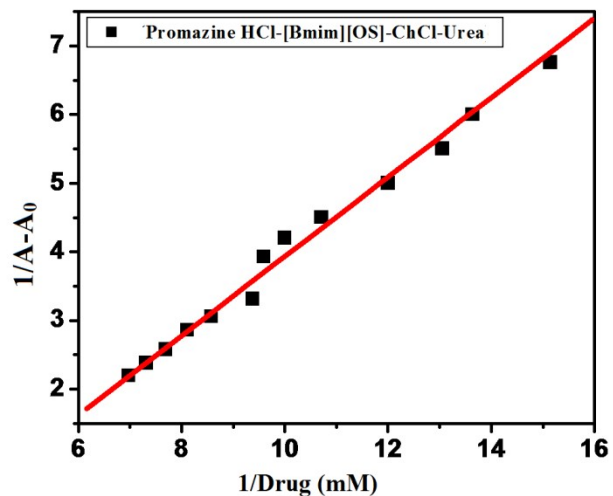

[B]

**Fig. S2** Absorption spectra of PH with increasing concentration of (A) Drugs-[Bmim][OS]-ChCl-Urea and (B) Benesi-Hildebrand plot using changes in absorption spectra of Drugs-[Bmim][OS]-ChCl-Urea.
